# Supplementary material
Source: PubMed Central journal article supplement (PMC2668008)
Supplement: mmc1.pdf [file mmc1.pdf]

## Supplemental Data

### Genome-wide Association and Replication Studies

#### Identified *TRHR* as an Important Gene

#### for Lean Body Mass

Xiao-Gang Liu, Li-Jun Tan, Shu-Feng Lei, Yong-Jun Liu, Hui Shen, Liang Wang, Han Yan, Yan-Fang Guo, Dong-Hai Xiong, Xiang-Ding Chen, Feng Pan, Tie-Lin Yang, Yin-Ping Zhang, Yan Guo, Nelson L. Tang, Xue-Zhen Zhu, Hong-Yi Deng, Shawn Levy, Robert R. Recker, Christopher J. Papasian, and Hong-Wen Deng

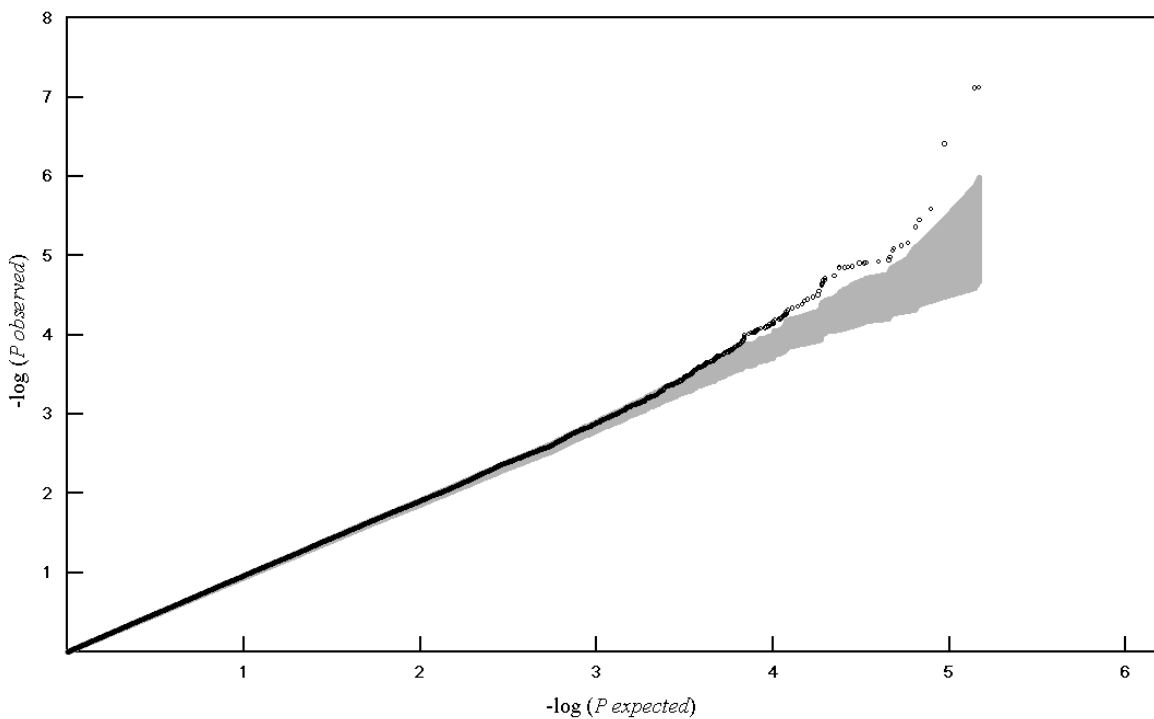

**Figure S1.** Quantile-quantile plot for GWA analyses of LBM. The vertical axis represents the observed  $-\log_{10}P$ , while the horizontal axis represents expected  $-\log_{10}P$  under the null hypothesis of no association. The shaded region is the 95% concentration band of  $-\log_{10}P$  (see the method section).

**Table S1.** SNPs showing significant and suggestive associations ( $p < 1.26 \times 10^{-4}$ ) with lean body mass in the GWA scan

| SNP <sup>a</sup> | Gene <sup>b</sup> | Location | Alleles <sup>c</sup> | MAF  | p value               | Effect size <sup>d</sup> | Favorable allele <sup>e</sup> |
|------------------|-------------------|----------|----------------------|------|-----------------------|--------------------------|-------------------------------|
| rs16892496       | <i>TRHR</i>       | 8q23.1   | G/T                  | 0.32 | $7.55 \times 10^{-8}$ | 0.107                    | G                             |
| rs7832552        | <i>TRHR</i>       | 8q23.1   | T/C                  | 0.32 | $7.58 \times 10^{-8}$ | 0.102                    | T                             |
| rs6544334        | <i>SLC8A1</i>     | 2p22.1   | A/C                  | 0.34 | $3.85 \times 10^{-7}$ | 0.079                    | C                             |
| rs4735098        | <i>TRHR</i>       | 8q23.1   | G/A                  | 0.38 | $2.57 \times 10^{-6}$ | 0.082                    | G                             |
| rs11836770       | <i>C12orf40</i>   | 12q12    | T/C                  | 0.14 | $3.53 \times 10^{-6}$ | 0.064                    | T                             |
| rs3925087        | <i>TRHR</i>       | 8q23.1   | C/T                  | 0.36 | $4.34 \times 10^{-6}$ | 0.096                    | C                             |
| rs10486610       | <i>CHN2</i>       | 7p15.1   | T/C                  | 0.20 | $6.91 \times 10^{-6}$ | 0.047                    | C                             |
| rs4466373        | <i>TRHR</i>       | 8q23.1   | T/C                  | 0.21 | $7.41 \times 10^{-6}$ | 0.061                    | T                             |
| rs6463106        | <i>GLI3</i>       | 7p14.1   | T/C                  | 0.11 | $8.11 \times 10^{-6}$ | 0.031                    | C                             |
| rs11170112       | <i>KRT82</i>      | 12q13.13 | G/A                  | 0.06 | $8.28 \times 10^{-6}$ | 0.116                    | G                             |
| rs2830395        | <i>ADAMTS1</i>    | 21q21.3  | T/A                  | 0.45 | $8.66 \times 10^{-6}$ | 0.082                    | A                             |
| rs4772757        | /                 | 13q33.2  | T/C                  | 0.20 | $1.03 \times 10^{-5}$ | 0.034                    | T                             |
| rs2289114        | <i>SLC12A3</i>    | 16q13    | A/G                  | 0.18 | $1.19 \times 10^{-5}$ | 0.013                    | A                             |
| rs10241947       | <i>C7orf25</i>    | 7p14.1   | T/A                  | 0.11 | $1.22 \times 10^{-5}$ | 0.033                    | A                             |
| rs10502983       | <i>MBD2</i>       | 18q21.2  | C/T                  | 0.23 | $1.23 \times 10^{-5}$ | 0.036                    | C                             |
| rs7240087        | <i>MBD2</i>       | 18q21.2  | A/G                  | 0.23 | $1.24 \times 10^{-5}$ | 0.045                    | A                             |
| rs13390165       | <i>KCNF1</i>      | 2p25.1   | T/C                  | 0.06 | $1.29 \times 10^{-5}$ | 0.130                    | T                             |
| rs4546626        | <i>TRHR</i>       | 8q23.1   | G/T                  | 0.36 | $1.37 \times 10^{-5}$ | 0.077                    | G                             |
| rs11077211       | <i>A2BP1</i>      | 16p13.2  | G/C                  | 0.12 | $1.40 \times 10^{-5}$ | 0.014                    | C                             |
| rs2926247        | <i>NUDCD1</i>     | 8q23.1   | G/A                  | 0.40 | $1.41 \times 10^{-5}$ | 0.075                    | G                             |
| rs11081118       | /                 | 18p11.31 | G/A                  | 0.14 | $1.43 \times 10^{-5}$ | 0.065                    | G                             |
| rs12313713       | <i>FLJ90579</i>   | 12q21.31 | G/A                  | 0.08 | $1.50 \times 10^{-5}$ | 0.102                    | G                             |
| rs7566764        | <i>FLJ42418</i>   | 2p25.2   | A/G                  | 0.21 | $1.79 \times 10^{-5}$ | 0.060                    | A                             |
| rs1918041        | <i>FLJ42418</i>   | 2p25.2   | T/C                  | 0.19 | $1.92 \times 10^{-5}$ | 0.072                    | T                             |
| rs1918043        | <i>FLJ42418</i>   | 2p25.2   | A/T                  | 0.19 | $2.04 \times 10^{-5}$ | 0.061                    | A                             |
| rs7845815        | <i>TRHR</i>       | 8q23.1   | A/G                  | 0.35 | $2.04 \times 10^{-5}$ | 0.075                    | A                             |
| rs242885         | <i>ISX</i>        | 22q12.3  | T/C                  | 0.02 | $2.16 \times 10^{-5}$ | 0.041                    | T                             |
| rs12333485       | <i>C7orf25</i>    | 7p14.1   | G/A                  | 0.11 | $2.24 \times 10^{-5}$ | 0.027                    | A                             |
| rs3757491        | <i>SYPL1</i>      | 7q22.2   | C/G                  | 0.46 | $2.24 \times 10^{-5}$ | 0.062                    | C                             |
| rs2715792        | <i>SPATA8</i>     | 15q26.2  | C/A                  | 0.48 | $2.28 \times 10^{-5}$ | 0.069                    | C                             |
| rs10111874       | <i>TRHR</i>       | 8q23.1   | G/A                  | 0.35 | $2.35 \times 10^{-5}$ | 0.075                    | G                             |
| rs4734197        | <i>TRHR</i>       | 8q23.1   | G/A                  | 0.34 | $2.39 \times 10^{-5}$ | 0.079                    | G                             |
| rs4314624        | <i>TRHR</i>       | 8q23.1   | C/G                  | 0.35 | $2.42 \times 10^{-5}$ | 0.078                    | C                             |
| rs9396715        | <i>OFCC1</i>      | 6p24.3   | T/C                  | 0.48 | $2.46 \times 10^{-5}$ | 0.047                    | T                             |
| rs2271084        | <i>KRT84</i>      | 12q13.13 | G/A                  | 0.06 | $2.47 \times 10^{-5}$ | 0.102                    | G                             |
| rs4607576        | <i>TRHR</i>       | 8q23.1   | T/C                  | 0.35 | $2.65 \times 10^{-5}$ | 0.078                    | T                             |
| rs7551656        | /                 | 1q23.3   | A/G                  | 0.09 | $2.75 \times 10^{-5}$ | 0.061                    | A                             |
| rs10800006       | /                 | 1q23.3   | A/T                  | 0.10 | $2.79 \times 10^{-5}$ | 0.056                    | A                             |

|            |                 |          |     |      |                       |       |   |
|------------|-----------------|----------|-----|------|-----------------------|-------|---|
| rs1568209  | <i>SLCO3A1</i>  | 15q26.1  | C/T | 0.49 | $2.80 \times 10^{-5}$ | 0.042 | T |
| rs2962549  | <i>ESM1</i>     | 5q11.2   | T/C | 0.41 | $2.84 \times 10^{-5}$ | 0.061 | C |
| rs4628236  | <i>TRHR</i>     | 8q23.1   | T/C | 0.35 | $3.09 \times 10^{-5}$ | 0.073 | T |
| rs1560617  | <i>C7orf25</i>  | 7p14.1   | A/C | 0.11 | $3.11 \times 10^{-5}$ | 0.029 | C |
| rs11785243 | <i>TRHR</i>     | 8q23.1   | A/G | 0.36 | $3.12 \times 10^{-5}$ | 0.075 | A |
| rs907526   | <i>GRPEL1</i>   | 4p16.1   | G/A | 0.29 | $3.24 \times 10^{-5}$ | 0.064 | A |
| rs7539840  | /               | 1q23.3   | G/A | 0.09 | $3.27 \times 10^{-5}$ | 0.063 | G |
| rs7690492  | <i>SLIT2</i>    | 4p15.31  | A/G | 0.20 | $3.28 \times 10^{-5}$ | 0.072 | G |
| rs17519016 | <i>MBD2</i>     | 18q21.2  | A/T | 0.19 | $3.32 \times 10^{-5}$ | 0.026 | A |
| rs545170   | <i>CSMD2</i>    | 1p35.1   | A/G | 0.06 | $3.32 \times 10^{-5}$ | 0.128 | A |
| rs6042222  | <i>TASP1</i>    | 20p12.1  | G/A | 0.30 | $3.33 \times 10^{-5}$ | 0.063 | A |
| rs751051   | <i>FLJ42418</i> | 2p25.2   | A/G | 0.19 | $3.34 \times 10^{-5}$ | 0.059 | A |
| rs9396752  | <i>OFCC1</i>    | 6p24.3   | T/C | 0.25 | $3.42 \times 10^{-5}$ | 0.085 | T |
| rs1017002  | <i>ICAI</i>     | 7p21.3   | C/T | 0.39 | $3.53 \times 10^{-5}$ | 0.081 | T |
| rs16945089 | <i>DNAH9</i>    | 17p12    | C/G | 0.18 | $3.66 \times 10^{-5}$ | 0.037 | C |
| rs853334   | <i>C3orf20</i>  | 3p24.3   | G/A | 0.37 | $3.66 \times 10^{-5}$ | 0.038 | A |
| rs16857721 | /               | 1q42.2   | T/G | 0.35 | $3.69 \times 10^{-5}$ | 0.107 | G |
| rs7481883  | <i>OPCML</i>    | 11q25    | A/C | 0.02 | $3.70 \times 10^{-5}$ | 0.078 | A |
| rs6539502  | <i>FLJ90579</i> | 12q21.31 | G/C | 0.09 | $3.90 \times 10^{-5}$ | 0.104 | G |
| rs2548629  | <i>ESM1</i>     | 5q11.2   | C/A | 0.40 | $3.97 \times 10^{-5}$ | 0.065 | A |
| rs10955513 | <i>NUDCD1</i>   | 8q23.1   | T/C | 0.41 | $4.09 \times 10^{-5}$ | 0.075 | T |
| rs6686539  | /               | 1q23.3   | A/T | 0.10 | $4.18 \times 10^{-5}$ | 0.060 | A |
| rs16857720 | /               | 1q42.2   | C/T | 0.35 | $4.37 \times 10^{-5}$ | 0.107 | T |
| rs4669054  | <i>FLJ42418</i> | 2p25.2   | A/T | 0.21 | $4.48 \times 10^{-5}$ | 0.030 | A |
| rs5999191  | <i>ISX</i>      | 22q12.3  | A/G | 0.02 | $4.53 \times 10^{-5}$ | 0.032 | A |
| rs5999190  | <i>ISX</i>      | 22q12.3  | G/T | 0.02 | $4.64 \times 10^{-5}$ | 0.031 | G |
| rs6726569  | /               | 2q22.3   | G/A | 0.39 | $4.65 \times 10^{-5}$ | 0.098 | A |
| rs1581541  | <i>LRRN3</i>    | 7q31.1   | G/C | 0.12 | $4.69 \times 10^{-5}$ | 0.065 | G |
| rs2780983  | <i>C9orf103</i> | 9q21.32  | G/A | 0.21 | $4.70 \times 10^{-5}$ | 0.031 | A |
| rs1416471  | /               | 6q14.1   | A/C | 0.13 | $4.86 \times 10^{-5}$ | 0.122 | A |
| rs10830423 | <i>NAALAD2</i>  | 11q14.3  | G/T | 0.11 | $5.00 \times 10^{-5}$ | 0.089 | G |
| rs12036860 | /               | 1q42.2   | G/C | 0.35 | $5.10 \times 10^{-5}$ | 0.104 | C |
| rs7297298  | <i>OR10AD1</i>  | 12q13.11 | G/C | 0.22 | $5.12 \times 10^{-5}$ | 0.085 | C |
| rs7230183  | <i>FBXO15</i>   | 18q22.3  | G/C | 0.03 | $5.23 \times 10^{-5}$ | 0.048 | C |
| rs3024342  | <i>F13A1</i>    | 6p25.1   | G/A | 0.21 | $5.24 \times 10^{-5}$ | 0.109 | G |
| rs4708220  | /               | 6q14.1   | C/G | 0.13 | $5.24 \times 10^{-5}$ | 0.123 | C |
| rs7705202  | /               | 5p15.2   | T/C | 0.48 | $5.24 \times 10^{-5}$ | 0.084 | T |
| rs1549905  | /               | 5q34     | A/G | 0.14 | $5.29 \times 10^{-5}$ | 0.074 | A |
| rs7186386  | <i>SMG1</i>     | 16p12.3  | A/G | 0.35 | $5.30 \times 10^{-5}$ | 0.072 | A |
| rs9352266  | /               | 6q14.1   | T/C | 0.13 | $5.32 \times 10^{-5}$ | 0.130 | T |
| rs4072864  | <i>DEXI</i>     | 16p13.13 | A/C | 0.20 | $5.39 \times 10^{-5}$ | 0.037 | C |
| rs1458926  | <i>NUDCD1</i>   | 8q23.1   | C/G | 0.41 | $5.41 \times 10^{-5}$ | 0.074 | C |
| rs6453855  | /               | 6q14.1   | C/G | 0.13 | $5.52 \times 10^{-5}$ | 0.119 | C |

|            |                    |         |     |      |                       |       |   |
|------------|--------------------|---------|-----|------|-----------------------|-------|---|
| rs4467744  | /                  | 6q14.1  | T/C | 0.13 | $5.63 \times 10^{-5}$ | 0.122 | T |
| rs6879343  | <i>CDH12</i>       | 5p14.3  | A/G | 0.14 | $5.80 \times 10^{-5}$ | 0.045 | A |
| rs10866415 | <i>FIP1L1</i>      | 4q12    | G/T | 0.38 | $5.95 \times 10^{-5}$ | 0.063 | T |
| rs7852833  | /                  | 9q21.13 | G/A | 0.49 | $5.96 \times 10^{-5}$ | 0.040 | A |
| rs1673450  | <i>MEIS1</i>       | 2p14    | A/G | 0.48 | $6.18 \times 10^{-5}$ | 0.088 | G |
| rs2548631  | <i>SNAG1</i>       | 5q11.2  | G/A | 0.41 | $6.19 \times 10^{-5}$ | 0.059 | A |
| rs10112296 | <i>TRHR</i>        | 8q23.1  | T/C | 0.35 | $6.20 \times 10^{-5}$ | 0.072 | T |
| rs1597245  | <i>SLC35F5</i>     | 2q14.1  | G/C | 0.37 | $6.25 \times 10^{-5}$ | 0.076 | G |
| rs1380098  | <i>TRHR</i>        | 8q23.1  | A/G | 0.41 | $6.28 \times 10^{-5}$ | 0.069 | A |
| rs1548083  | <i>NUDCD1</i>      | 8q23.1  | T/A | 0.41 | $6.39 \times 10^{-5}$ | 0.069 | T |
| rs3794650  | <i>SLC12A3</i>     | 16q13   | C/T | 0.13 | $6.45 \times 10^{-5}$ | 0.023 | C |
| rs7581611  | <i>SLC8A1</i>      | 2p22.1  | T/C | 0.42 | $6.60 \times 10^{-5}$ | 0.070 | C |
| rs4564178  | <i>NFIA</i>        | 1p32.1  | C/T | 0.03 | $6.73 \times 10^{-5}$ | 0.096 | C |
| rs1542604  | <i>ARHGEF4</i>     | 2q21.1  | T/C | 0.15 | $6.85 \times 10^{-5}$ | 0.087 | T |
| rs38774    | /                  | 7p12.3  | T/C | 0.40 | $6.87 \times 10^{-5}$ | 0.071 | T |
| rs4469429  | <i>TMEM74</i>      | 8q23.1  | C/A | 0.21 | $7.22 \times 10^{-5}$ | 0.058 | C |
| rs12535724 | <i>GLI3</i>        | 7p14.1  | T/A | 0.11 | $7.34 \times 10^{-5}$ | 0.019 | A |
| rs2542242  | <i>C9orf50</i>     | 9q34.11 | G/A | 0.49 | $7.37 \times 10^{-5}$ | 0.063 | G |
| rs264607   | <i>TANC1</i>       | 2q24.1  | T/C | 0.39 | $7.53 \times 10^{-5}$ | 0.104 | T |
| rs17678863 | <i>CHN2</i>        | 7p15.1  | T/C | 0.20 | $7.58 \times 10^{-5}$ | 0.034 | C |
| rs2740354  | <i>FAM57A</i>      | 17p13.3 | T/C | 0.38 | $7.85 \times 10^{-5}$ | 0.073 | T |
| rs10266289 | /                  | 7p12.3  | C/T | 0.40 | $7.86 \times 10^{-5}$ | 0.070 | C |
| rs6736915  | <i>NOL10</i>       | 2p25.1  | C/T | 0.05 | $7.92 \times 10^{-5}$ | 0.032 | T |
| rs4861722  | <i>MTNR1A</i>      | 4q35.2  | G/A | 0.34 | $8.01 \times 10^{-5}$ | 0.083 | G |
| rs4978818  | <i>PALM2-AKAP2</i> | 9q31.3  | C/G | 0.14 | $8.03 \times 10^{-5}$ | 0.063 | C |
| rs12347532 | <i>MLLT3</i>       | 9p22.1  | G/T | 0.36 | $8.07 \times 10^{-5}$ | 0.056 | T |
| rs2609103  | <i>FLJ42418</i>    | 2p25.2  | A/G | 0.25 | $8.07 \times 10^{-5}$ | 0.069 | A |
| rs1422882  | <i>IL12B</i>       | 5q33.3  | C/T | 0.50 | $8.25 \times 10^{-5}$ | 0.075 | C |
| rs6990979  | <i>RIPK2</i>       | 8q21.3  | A/G | 0.04 | $8.29 \times 10^{-5}$ | 0.074 | A |
| rs4735116  | <i>TRHR</i>        | 8q23.1  | G/T | 0.41 | $8.51 \times 10^{-5}$ | 0.075 | G |
| rs2926220  | <i>NUDCD1</i>      | 8q23.1  | A/G | 0.42 | $8.76 \times 10^{-5}$ | 0.068 | A |
| rs17793705 | /                  | 4q34.3  | A/G | 0.21 | $8.86 \times 10^{-5}$ | 0.055 | G |
| rs1878315  | <i>SETBP1</i>      | 18q12.3 | C/T | 0.35 | $8.87 \times 10^{-5}$ | 0.068 | C |
| rs12441195 | /                  | 15q26.2 | T/G | 0.04 | $8.94 \times 10^{-5}$ | 0.145 | T |
| rs1380099  | <i>NUDCD1</i>      | 8q23.1  | G/C | 0.41 | $8.97 \times 10^{-5}$ | 0.072 | G |
| rs12548521 | <i>SAMD12</i>      | 8q24.12 | C/T | 0.49 | $9.05 \times 10^{-5}$ | 0.094 | T |
| rs12453454 | <i>CD300E</i>      | 17q25.1 | T/C | 0.33 | $9.14 \times 10^{-5}$ | 0.076 | C |
| rs12691747 | /                  | 2q22.3  | C/T | 0.44 | $9.18 \times 10^{-5}$ | 0.063 | T |
| rs965103   | /                  | 5q34    | G/A | 0.14 | $9.21 \times 10^{-5}$ | 0.077 | G |
| rs1107533  | <i>PBX1</i>        | 1q23.3  | C/T | 0.27 | $9.29 \times 10^{-5}$ | 0.074 | T |
| rs11650378 | <i>CD300C</i>      | 17q25.1 | T/C | 0.31 | $9.29 \times 10^{-5}$ | 0.056 | C |
| rs6469245  | <i>TRHR</i>        | 8q23.1  | C/G | 0.41 | $9.42 \times 10^{-5}$ | 0.076 | C |
| rs2276443  | <i>GDPD5</i>       | 11q13.4 | G/T | 0.07 | $9.44 \times 10^{-5}$ | 0.031 | T |

|            |                 |          |     |      |                       |       |   |
|------------|-----------------|----------|-----|------|-----------------------|-------|---|
| rs9287107  | <i>ZNF281</i>   | 1q32.1   | G/A | 0.08 | $9.51 \times 10^{-5}$ | 0.061 | A |
| rs1054260  | /               | 15q23    | G/A | 0.37 | $9.60 \times 10^{-5}$ | 0.081 | A |
| rs1532694  | <i>NR2F1</i>    | 5q15     | C/T | 0.49 | $9.82 \times 10^{-5}$ | 0.064 | C |
| rs9317632  | <i>PCDH9</i>    | 13q21.32 | G/A | 0.20 | $9.92 \times 10^{-5}$ | 0.079 | G |
| rs10947091 | /               | 6p21.33  | A/G | 0.29 | $1.01 \times 10^{-4}$ | 0.020 | G |
| rs27311    | <i>RIOK2</i>    | 5q15     | C/A | 0.14 | $1.02 \times 10^{-4}$ | 0.088 | C |
| rs2825653  | /               | 21q21.1  | G/A | 0.11 | $1.04 \times 10^{-4}$ | 0.079 | G |
| rs3185695  | <i>PBX1</i>     | 1q23.3   | T/C | 0.27 | $1.04 \times 10^{-4}$ | 0.074 | C |
| rs10515963 | <i>MBD2</i>     | 18q21.2  | C/T | 0.19 | $1.05 \times 10^{-4}$ | 0.017 | C |
| rs17536109 | <i>ATPBD4</i>   | 15q14    | G/T | 0.43 | $1.05 \times 10^{-4}$ | 0.043 | T |
| rs10918076 | <i>PBX1</i>     | 1q23.3   | A/T | 0.27 | $1.08 \times 10^{-4}$ | 0.074 | T |
| rs10875772 | <i>OR10AD1</i>  | 12q13.11 | T/C | 0.20 | $1.09 \times 10^{-4}$ | 0.099 | C |
| rs10514810 | <i>SLC35F5</i>  | 2q14.1   | A/G | 0.27 | $1.12 \times 10^{-4}$ | 0.068 | A |
| rs853780   | <i>ABCB11</i>   | 2q31.1   | G/C | 0.46 | $1.12 \times 10^{-4}$ | 0.088 | G |
| rs11160571 | <i>EVL</i>      | 14q32.2  | T/C | 0.03 | $1.13 \times 10^{-4}$ | 0.050 | T |
| rs4454609  | <i>C10orf49</i> | 10p13    | A/T | 0.23 | $1.13 \times 10^{-4}$ | 0.025 | A |
| rs2926273  | <i>NUDCD1</i>   | 8q23.1   | G/A | 0.40 | $1.14 \times 10^{-4}$ | 0.067 | G |
| rs729697   | <i>ETV6</i>     | 12p13.2  | G/A | 0.35 | $1.14 \times 10^{-4}$ | 0.058 | G |
| rs1412461  | /               | 9q21.13  | T/C | 0.32 | $1.15 \times 10^{-4}$ | 0.031 | T |
| rs17659764 | <i>WDR72</i>    | 15q21.3  | A/G | 0.11 | $1.15 \times 10^{-4}$ | 0.056 | A |
| rs4236448  | <i>ACTR3B</i>   | 7q36.2   | A/G | 0.01 | $1.15 \times 10^{-4}$ | 0.050 | A |
| rs11217872 | <i>ARHGEF12</i> | 11q23.3  | C/G | 0.22 | $1.16 \times 10^{-4}$ | 0.061 | G |

- a The SNPs are in the order of the magnitude of p values.
- b The associated genes for SNPs are based on the data from NetAffx Analysis Center.
- c The minor allele is placed ahead of the slash.
- d Per-allele effect size of the favorable allele is expressed by beta coefficients derived from linear regression analyses.
- e Subjects with more favorable alleles generally have higher values of lean body mass than subjects having alternative genotypes in the population.

**Table S2.** The HPTA and GH-IGF1 pathway genes tested in the interaction analyses

| Gene                                                                           | Number of SNPs tested |
|--------------------------------------------------------------------------------|-----------------------|
| <i>GHI</i> (growth hormone 1)                                                  | 1                     |
| <i>GH2</i> (growth hormone 2)                                                  | 4                     |
| <i>GHITM</i> (growth hormone inducible transmembrane protein)                  | 52                    |
| <i>GHR</i> (growth hormone receptor)                                           | 91                    |
| <i>GHRH</i> (growth hormone releasing hormone)                                 | 2                     |
| <i>GHRHR</i> (growth hormone releasing hormone receptor)                       | 12                    |
| <i>GHRL</i> (ghrelin/obestatin preprohormone)                                  | 4                     |
| <i>GHSR</i> (growth hormone secretagogue receptor)                             | 8                     |
| <i>IGF1</i> [insulin-like growth factor 1 (somatomedin C)]                     | 97                    |
| <i>IGF1R</i> (insulin-like growth factor 1 receptor)                           | 76                    |
| <i>IGF2</i> [insulin-like growth factor 2 (somatomedin A)]                     | 9                     |
| <i>IGF2AS</i> (insulin-like growth factor 2 antisense)                         | 4                     |
| <i>IGF2BP1</i> (insulin-like growth factor 2 mRNA binding protein 1)           | 10                    |
| <i>IGF2BP2</i> (insulin-like growth factor 2 mRNA binding protein 2)           | 19                    |
| <i>IGF2BP3</i> (insulin-like growth factor 2 mRNA binding protein 3)           | 22                    |
| <i>IGF2R</i> (insulin-like growth factor 2 receptor)                           | 27                    |
| <i>IGFALS</i> (insulin-like growth factor binding protein acid labile subunit) | 3                     |
| <i>IGFBP1</i> (insulin-like growth factor binding protein 1)                   | 10                    |
| <i>IGFBP2</i> (insulin-like growth factor binding protein 2)                   | 10                    |
| <i>IGFBP3</i> (insulin-like growth factor binding protein 3)                   | 9                     |
| <i>IGFBP4</i> (insulin-like growth factor binding protein 4)                   | 8                     |
| <i>IGFBP5</i> (insulin-like growth factor binding protein 5)                   | 37                    |
| <i>IGFBP6</i> (insulin-like growth factor binding protein 6)                   | 2                     |
| <i>IGFBP7</i> (insulin-like growth factor binding protein 7)                   | 73                    |
| <i>IGFBPL1</i> (insulin-like growth factor binding protein-like 1)             | 30                    |
| <i>IGFL1</i> (IGF-like family member 1)                                        | 8                     |
| <i>IGFL2</i> (IGF-like family member 2)                                        | 5                     |
| <i>IGFL3</i> (IGF-like family member 3)                                        | 1                     |
| <i>IGFL4</i> (IGF-like family member 4)                                        | 5                     |
| <i>TRH</i> (thyrotropin-releasing hormone)                                     | 11                    |
| <i>TRHDE</i> (thyrotropin-releasing hormone degrading enzyme)                  | 223                   |
| <i>TSHB</i> (thyroid stimulating hormone beta)                                 | 3                     |
| <i>TSHR</i> (thyroid stimulating hormone receptor)                             | 36                    |

**Table S3.** SNPs putatively interacting with rs16892496 of the *TRHR* gene in determination of lean body mass

| SNP <sup>a</sup> | Gene           | MAF <sup>b</sup> | Alleles <sup>c</sup> | Location | p value                | GWA p value <sup>d</sup> |
|------------------|----------------|------------------|----------------------|----------|------------------------|--------------------------|
| rs12474719       | <i>IGFBP5</i>  | 0.12             | A/G                  | 2q35     | $6.04 \times 10^{-11}$ | $6.31 \times 10^{-2}$    |
| rs2350142        | <i>GHITM</i>   | 0.15             | T/C                  | 10q23.1  | $6.73 \times 10^{-10}$ | $3.33 \times 10^{-2}$    |
| rs187985         | <i>IGF2BP3</i> | 0.17             | C/T                  | 7p15.3   | $6.87 \times 10^{-10}$ | $2.54 \times 10^{-3}$    |
| rs6585795        | <i>GHITM</i>   | 0.15             | A/C                  | 10q23.1  | $7.08 \times 10^{-10}$ | $1.42 \times 10^{-2}$    |
| rs769153         | <i>IGFBPL1</i> | 0.27             | C/A                  | 9p13.1   | $7.46 \times 10^{-10}$ | $2.41 \times 10^{-2}$    |
| rs7038678        | <i>IGFBPL1</i> | 0.28             | G/A                  | 9p13.1   | $8.99 \times 10^{-10}$ | $4.74 \times 10^{-2}$    |
| rs7955640        | <i>IGF1</i>    | 0.21             | T/C                  | 12q23.2  | $1.26 \times 10^{-9}$  | $3.64 \times 10^{-2}$    |
| rs3743261        | <i>IGF1R</i>   | 0.02             | T/C                  | 15q26.3  | $1.46 \times 10^{-9}$  | 0.27                     |
| rs10745938       | <i>IGF1</i>    | 0.50             | G/A                  | 12q23.2  | $1.99 \times 10^{-9}$  | 0.21                     |
| rs1030065        | <i>IGFBP5</i>  | 0.30             | C/T                  | 2q35     | $2.29 \times 10^{-9}$  | $1.63 \times 10^{-4}$    |
| rs4503597        | <i>IGF1</i>    | 0.49             | G/A                  | 12q23.2  | $2.36 \times 10^{-9}$  | 0.13                     |
| rs12765881       | <i>GHITM</i>   | 0.19             | A/G                  | 10q23.1  | $2.50 \times 10^{-9}$  | 0.23                     |
| rs509035         | <i>GHSR</i>    | 0.31             | A/G                  | 3q26.31  | $2.98 \times 10^{-9}$  | 0.12                     |
| rs1476844        | <i>IGFBP7</i>  | 0.29             | A/G                  | 4q12     | $3.11 \times 10^{-9}$  | 0.32                     |
| rs4764695        | <i>IGF1</i>    | 0.49             | A/G                  | 12q23.2  | $3.14 \times 10^{-9}$  | 0.15                     |
| rs687088         | <i>IGF2R</i>   | 0.30             | T/C                  | 6q25.3   | $3.42 \times 10^{-9}$  | 0.30                     |
| rs11857366       | <i>IGF1R</i>   | 0.41             | A/G                  | 15q26.3  | $3.60 \times 10^{-9}$  | $3.01 \times 10^{-2}$    |
| rs1317459        | <i>IGF1R</i>   | 0.06             | C/G                  | 15q26.3  | $3.77 \times 10^{-9}$  | 0.22                     |
| rs2412775        | <i>IGFBP7</i>  | 0.45             | T/C                  | 4q12     | $3.88 \times 10^{-9}$  | $3.54 \times 10^{-4}$    |
| rs1464433        | <i>IGF1R</i>   | 0.03             | G/A                  | 15q26.3  | $3.94 \times 10^{-9}$  | 0.39                     |
| rs2350140        | <i>GHITM</i>   | 0.19             | A/C                  | 10q23.1  | $4.47 \times 10^{-9}$  | 0.13                     |
| rs12582912       | <i>TRHDE</i>   | 0.20             | A/G                  | 12q21.1  | $4.54 \times 10^{-9}$  | $4.18 \times 10^{-2}$    |
| rs2176235        | <i>TRHDE</i>   | 0.20             | G/A                  | 12q21.1  | $4.58 \times 10^{-9}$  | $3.46 \times 10^{-2}$    |
| rs2271808        | <i>IGFBP7</i>  | 0.40             | T/C                  | 4q12     | $5.16 \times 10^{-9}$  | $6.52 \times 10^{-2}$    |
| rs2940919        | <i>GHR</i>     | 0.17             | G/A                  | 5p12     | $5.48 \times 10^{-9}$  | $6.23 \times 10^{-2}$    |
| rs11111347       | <i>IGF1</i>    | 0.04             | T/A                  | 12q23.2  | $5.98 \times 10^{-9}$  | $2.52 \times 10^{-2}$    |
| rs2541408        | <i>IGFBP5</i>  | 0.17             | A/G                  | 2q35     | $6.12 \times 10^{-9}$  | $4.29 \times 10^{-2}$    |
| rs2195103        | <i>TSHR</i>    | 0.43             | C/T                  | 14q31.1  | $6.56 \times 10^{-9}$  | $2.44 \times 10^{-2}$    |
| rs9341191        | <i>IGFBP2</i>  | 0.06             | T/C                  | 2q35     | $6.80 \times 10^{-9}$  | 0.97                     |
| rs4802289        | <i>IGFL3</i>   | 0.40             | G/A                  | 19q13.32 | $6.97 \times 10^{-9}$  | $2.06 \times 10^{-2}$    |
| rs2887021        | <i>TRHDE</i>   | 0.01             | A/G                  | 12q21.1  | $6.99 \times 10^{-9}$  | 0.68                     |
| rs7137407        | <i>TRHDE</i>   | 0.01             | A/C                  | 12q21.1  | $7.20 \times 10^{-9}$  | 0.67                     |
| rs12050077       | <i>TSHR</i>    | 0.43             | A/G                  | 14q31.1  | $7.23 \times 10^{-9}$  | $2.03 \times 10^{-2}$    |
| rs703548         | <i>IGF1</i>    | 0.15             | T/C                  | 12q23.2  | $7.28 \times 10^{-9}$  | 0.11                     |
| rs4394481        | <i>IGFBPL1</i> | 0.47             | A/G                  | 9p13.1   | $7.35 \times 10^{-9}$  | $9.39 \times 10^{-3}$    |
| rs11179614       | <i>TRHDE</i>   | 0.10             | A/G                  | 12q21.1  | $7.57 \times 10^{-9}$  | $7.24 \times 10^{-3}$    |
| rs6909681        | <i>IGF2R</i>   | 0.47             | A/T                  | 6q25.3   | $7.66 \times 10^{-9}$  | 0.67                     |
| rs4132296        | <i>IGFBP7</i>  | 0.25             | T/C                  | 4q12     | $7.69 \times 10^{-9}$  | 0.27                     |
| rs4100646        | <i>IGFALS</i>  | 0.26             | T/C                  | 16p13.3  | $7.82 \times 10^{-9}$  | 0.63                     |
| rs907801         | <i>IGF1R</i>   | 0.16             | G/A                  | 15q26.3  | $7.83 \times 10^{-9}$  | 0.27                     |

|            |                |      |     |         |                       |                       |
|------------|----------------|------|-----|---------|-----------------------|-----------------------|
| rs2311759  | <i>IGF1R</i>   | 0.13 | A/G | 15q26.3 | $8.03 \times 10^{-9}$ | 0.77                  |
| rs11179317 | <i>TRHDE</i>   | 0.01 | C/T | 12q21.1 | $8.68 \times 10^{-9}$ | 0.70                  |
| rs11179583 | <i>TRHDE</i>   | 0.16 | T/C | 12q21.1 | $8.72 \times 10^{-9}$ | $8.19 \times 10^{-2}$ |
| rs12551371 | <i>IGFBPL1</i> | 0.11 | A/G | 9p13.1  | $8.79 \times 10^{-9}$ | $1.72 \times 10^{-2}$ |
| rs11834071 | <i>TRHDE</i>   | 0.01 | C/T | 12q21.1 | $8.88 \times 10^{-9}$ | 0.67                  |
| rs734351   | <i>IGF2</i>    | 0.38 | C/T | 11p15.5 | $9.06 \times 10^{-9}$ | 0.27                  |
| rs11832784 | <i>TRHDE</i>   | 0.01 | T/C | 12q21.1 | $9.13 \times 10^{-9}$ | 0.68                  |
| rs10866443 | <i>IGFBP7</i>  | 0.25 | T/C | 4q12    | $9.21 \times 10^{-9}$ | 0.25                  |
| rs11200853 | <i>GHITM</i>   | 0.01 | A/T | 10q23.1 | $9.38 \times 10^{-9}$ | 0.20                  |
| rs1467574  | <i>IGFBPL1</i> | 0.25 | A/G | 9p13.1  | $9.49 \times 10^{-9}$ | $8.26 \times 10^{-2}$ |
| rs12426318 | <i>IGF1</i>    | 0.12 | A/C | 12q23.2 | $9.66 \times 10^{-9}$ | $6.70 \times 10^{-2}$ |
| rs11829367 | <i>IGF1</i>    | 0.02 | A/G | 12q23.2 | $9.71 \times 10^{-9}$ | 0.87                  |
| rs10178069 | <i>IGFBP5</i>  | 0.15 | G/A | 2q35    | $9.79 \times 10^{-9}$ | $5.84 \times 10^{-2}$ |

<sup>a</sup> Only SNPs with  $p < 1.00 \times 10^{-8}$  in the interaction analyses with rs16892496 are listed.

<sup>b</sup> Minor allele frequency in our GWA sample.

<sup>c</sup> The minor allele is placed ahead of the slash

<sup>d</sup> The p values from the GWA scan
